# Supplementary material for: Active nanoparticle targeting of MUC5AC ameliorates therapeutic outcome in experimental colitis
Source: Royal Society of Chemistry journal article supplement (doi:10.1039/d3nr05681c), 2024-01-01
Supplement: d3nr05681c1.pdf [file d3nr05681c1.pdf]

# SUPPLEMENTARY FIGURES

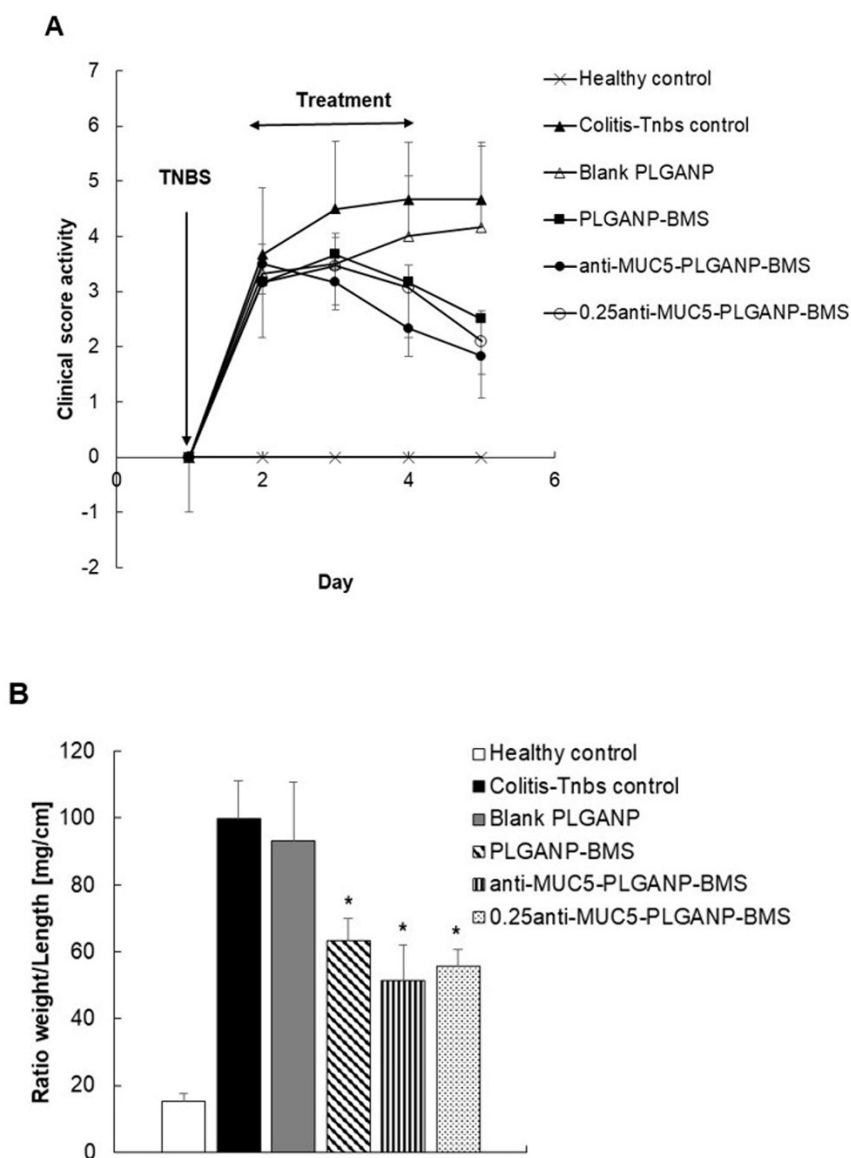

**Figure S-1:** Therapeutic efficiency of the administrated PLGANPs and anti-MUC5 conjugates (two concentrations of anti-MUC5) in murine TNBS induced colitis.

**A:** Clinical activity score during the whole experimental period after rectal formulations administration.

**B:** Colon/body weight ratio after treatment of PLGANPs and anti-MUC5 conjugates. All treatments were significantly different from colitis control (Mean  $\pm$  SD; n=6; \*p<0.05).

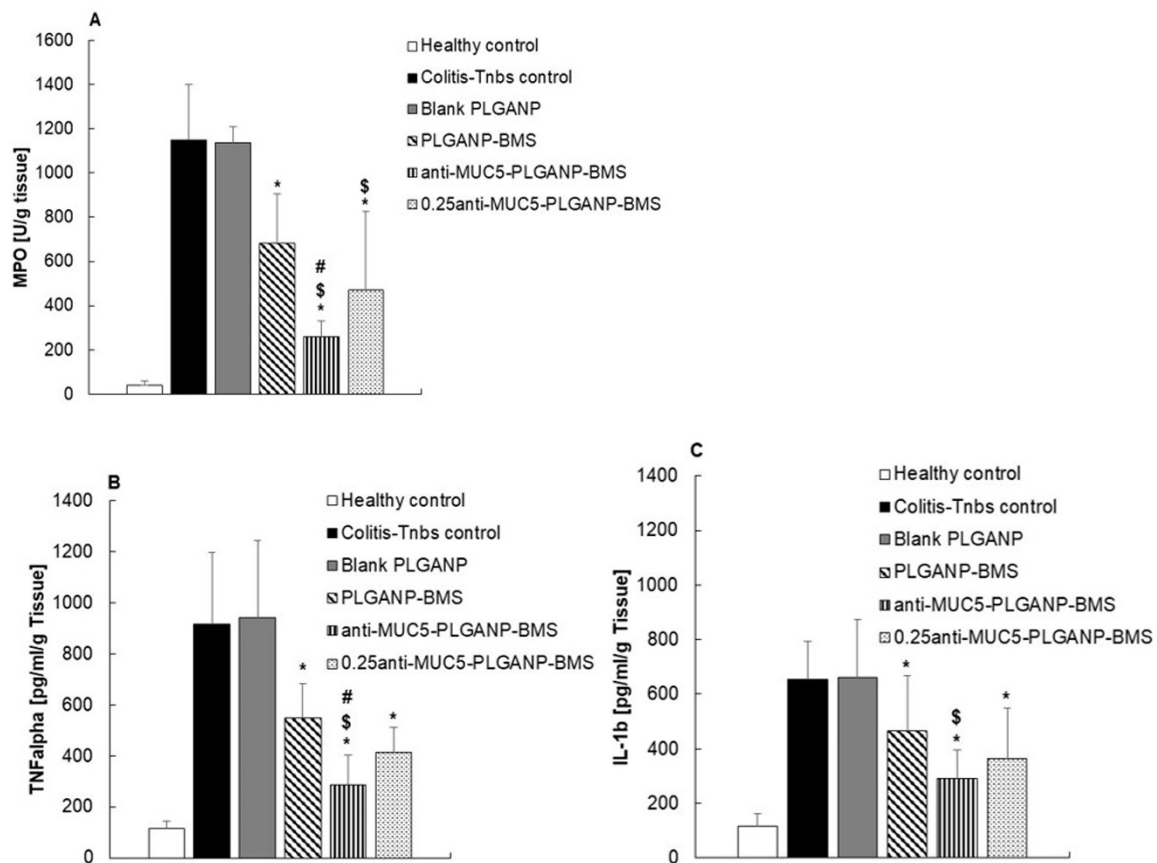

**Figure S-2:** MPO (A) and pro-inflammatory cytokines (B = TNF- $\alpha$ ; C = IL-1 $\beta$ ) activities after treatment of PLGANPs and anti-MUC5 conjugates (two concentrations of anti-MUC5).

**A:** Compared to the colitis control group the BMS loaded PLGANPs show a lower activity of the MPO as a parameter of the inflammation. The anti-MUC5 conjugates showed the lowest activity.

**B:** The untreated colitis-group showed elevated concentrations of TNF- $\alpha$  in the tissue indicating the active inflammation. Blank and unloaded PLGA-NP also showed high concentrations of TNF- $\alpha$  compared the groups with BMS loaded PLGANPs. anti-MUC5 conjugates reduced the TNF- $\alpha$  levels the most.

**C:** Compared to the healthy control the colitis groups showed high levels of IL-1 $\beta$  in the tissue. Treatment with BMS-containing PLGANPs showed significant lower concentrations of the cytokine.

All treatments were significantly different from colitis control (Mean  $\pm$  SD; n=6; # p<0.05 compared to PLGANP-BMS, \$p<0.05 compared to 0.25AMUC5AC-PLGANP-BMS).
